# Supplementary material for: Preventing postnatal maternal mental health problems using a psychoeducational intervention: the cost-effectiveness of What Were We Thinking
Source: PubMed Central journal article supplement — BMJ Open. 2016 Nov 18;6(11):e012086. doi: 10.1136/bmjopen-2016-012086 (PMC5128834; doi:10.1136/bmjopen-2016-012086), 2016-11-18

Online supplementary material

**Unit costs, their sources, and relevant public sector where applicable**

| Service type                                         | Unit cost (\$A)            | Source for unit cost                                                          |
|------------------------------------------------------|----------------------------|-------------------------------------------------------------------------------|
| MCH services                                         |                            |                                                                               |
| MCH visit                                            | 44.88                      | } Standard hourly rate for MCH services <sup>^</sup> (Early childhood sector) |
| MCH home visit                                       | 143.64                     |                                                                               |
| MCH telephone line                                   | 22.44                      |                                                                               |
| First-time parents' group session                    | 29.92                      |                                                                               |
| Mental health                                        |                            |                                                                               |
| Psychologist                                         | 99.75 + OOP*               | MBS# (Health sector)                                                          |
| Psychiatrist                                         | 133.10 + OOP*              | MBS# (Health sector)                                                          |
| Counsellor                                           | OOP*                       |                                                                               |
| Psychiatric mother-baby unit admission               | 5307.56                    | Weighted National Efficient Price (Health sector)                             |
| Web therapy session                                  | 30                         | Market rate (Health sector)                                                   |
| Medication                                           |                            |                                                                               |
| Prescribed                                           | OOP*                       |                                                                               |
| Over the counter                                     | OOP*                       |                                                                               |
| Primary care                                         |                            |                                                                               |
| GP clinic visit                                      | 36.30                      | MBS# (Health sector)                                                          |
| GP home visit                                        | 61.75                      | MBS# (Health sector)                                                          |
| Clinic nurse                                         | OOP*                       |                                                                               |
| Medical                                              |                            |                                                                               |
| Obstetrician                                         | 43.00                      | MBS# (Health sector)                                                          |
| Paediatrician                                        | 85.55                      | MBS# (Health sector)                                                          |
| Other specialist                                     | 85.55                      | MBS# (Health sector)                                                          |
| Allied health                                        |                            |                                                                               |
| Physiotherapist                                      | OOP*                       |                                                                               |
| Dietician                                            | OOP*                       |                                                                               |
| Social worker                                        | 62.25                      | MBS# (Health sector)                                                          |
| Complementary healthcare provider                    | OOP*                       |                                                                               |
| Hospital-related                                     |                            |                                                                               |
| Outpatients clinic                                   | As per clinic type         | } Weighted National Efficient Price (Health sector)                           |
| Emergency department visit                           | 385.96 (triage category 4) |                                                                               |
| Hospital admission                                   | As per admission           |                                                                               |
| Early parenting services                             |                            |                                                                               |
| Residential early parenting centre 5-night admission | 3500 + OOP*                | } Expert opinion (Human services sector)                                      |
| Early parenting centre day stay                      | 300 + OOP*                 |                                                                               |
| Lactation consultant                                 | OOP*                       |                                                                               |
| Mothercraft nurse                                    | OOP*                       |                                                                               |
| Support group                                        | 10                         | Market rate                                                                   |
| Other parenting service                              | OOP*                       |                                                                               |

<sup>^</sup>Standard hourly rate for MCH services[17] \*OOP=Out Of Pocket cost reported by participant #MBS=Medicare Benefits Schedule

### Incremental adjusted costs and QALYs in each scenario

| Scenario                                                                                                | Difference in costs (\$A)<br>(95% CI) | Difference in QALYs<br>(95% CI) |
|---------------------------------------------------------------------------------------------------------|---------------------------------------|---------------------------------|
| Base case                                                                                               | 268.69<br>(-319.21, 856.59)           | 0.007<br>(-0.011, 0.025)        |
| With multiple imputation of missing data                                                                | 249.76<br>(-198.46, 697.98)           | 0.006<br>(-0.007, 0.018)        |
| Only baseline variables in regression models                                                            | 268.69<br>(-319.21, 856.59)           | 0.008<br>(-0.009, 0.025)        |
| Assuming MCH nurse training lasts 1 year                                                                | 287.78<br>(-299.51, 875.07)           | 0.007<br>(-0.011, 0.025)        |
| Number of participants per <i>WWWT</i> session =5                                                       | 289.06<br>(-298.19, 876.31)           | 0.007<br>(-0.011, 0.025)        |
| Number of participants per <i>WWWT</i> session=7                                                        | 254.11<br>(-334.28, 842.50)           | 0.007<br>(-0.011, 0.025)        |
| Health sector costs only                                                                                | 371.21<br>(-144.12, 886.54)           | 0.007<br>(-0.011, 0.025)        |
| Early childhood sector costs only                                                                       | 136.12<br>(82.81, 189.42)             | 0.007<br>(-0.011, 0.025)        |
| Public sector costs only                                                                                | 220.54<br>(-352.48, 793.56)           | 0.007<br>(-0.011, 0.025)        |
| Individual-level incremental costs at upper end of 95%CI,<br>incremental outcomes at lower end of 95%CI | 481.80<br>(-536.37, 1499.97)          | 0.007<br>(-0.011, 0.025)        |
| Individual-level incremental costs at lower end of 95%CI,<br>incremental outcomes at upper end of 95%CI | 141.86<br>(-298.50, 582.22)           | 0.007<br>(-0.011, 0.025)        |
| Linear models for costs and outcomes                                                                    | 145.26<br>(-499.20, 789.72)           | 0.007<br>(-0.011, 0.025)        |

Supplementary Figure 1. Cost-effectiveness plane – cost per percentage-point reduction in 30-day prevalence of depression, anxiety and adjustment disorders

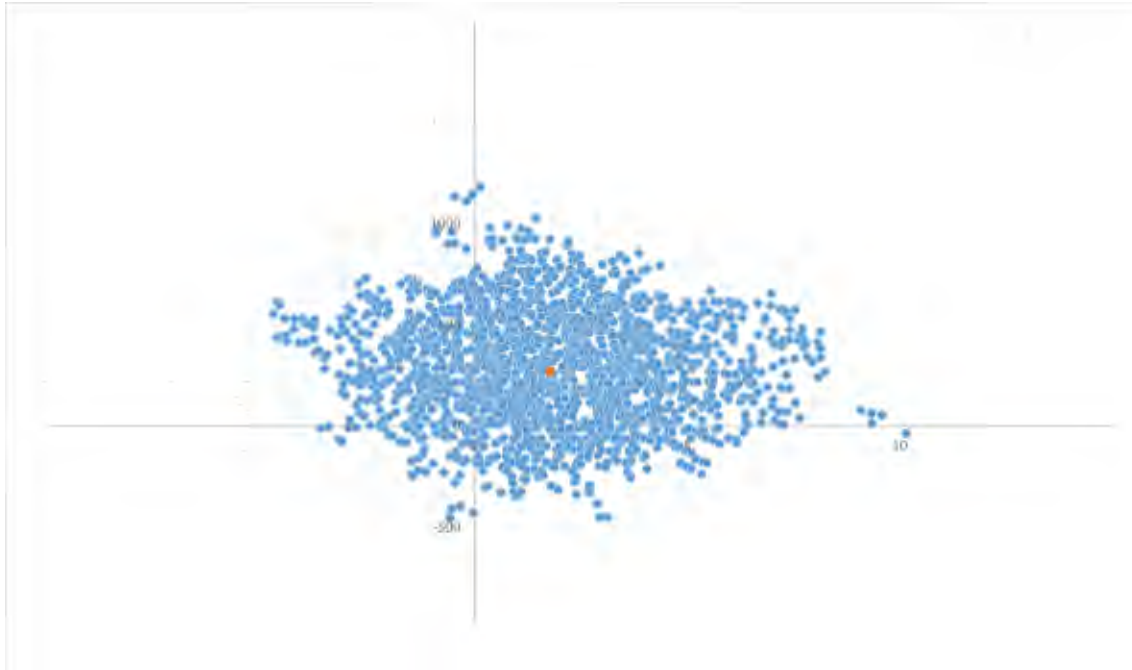

Supplementary Figure 2. Cost-effectiveness acceptability curve – cost per QALY

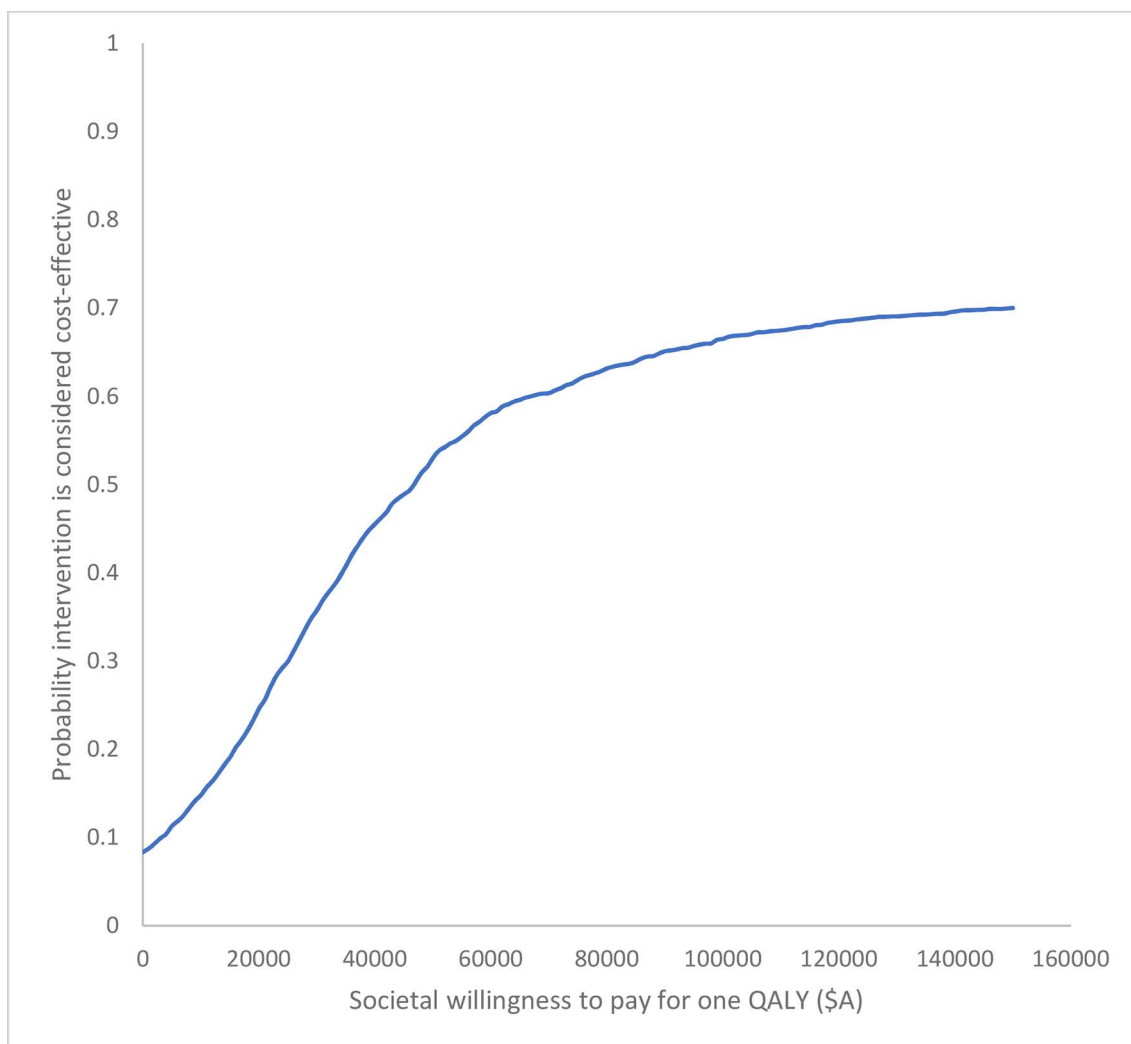

Supplement: bmjopen-2016-012086supp.pdf [file bmjopen-2016-012086supp.pdf]
